# Supplementary figures and images for: Pervasive transcription fine-tunes replication origin activity
Source: eLife journal article supplement (doi:10.7554/elife.40802), 2018-12-17

# Candelli *et al.*, Figure 3-figure supplement 1

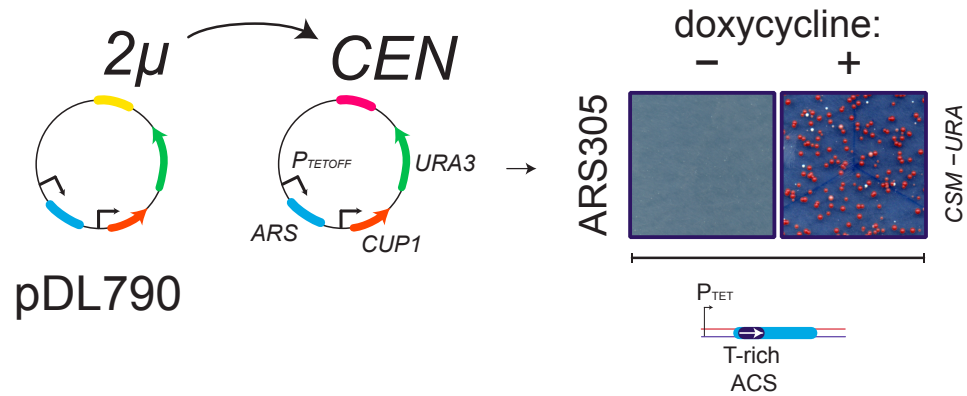

Supplement: supp [file elife-40802-supp-v1.zip]

# Candelli *et al.*, Figure 1-figure supplement 2

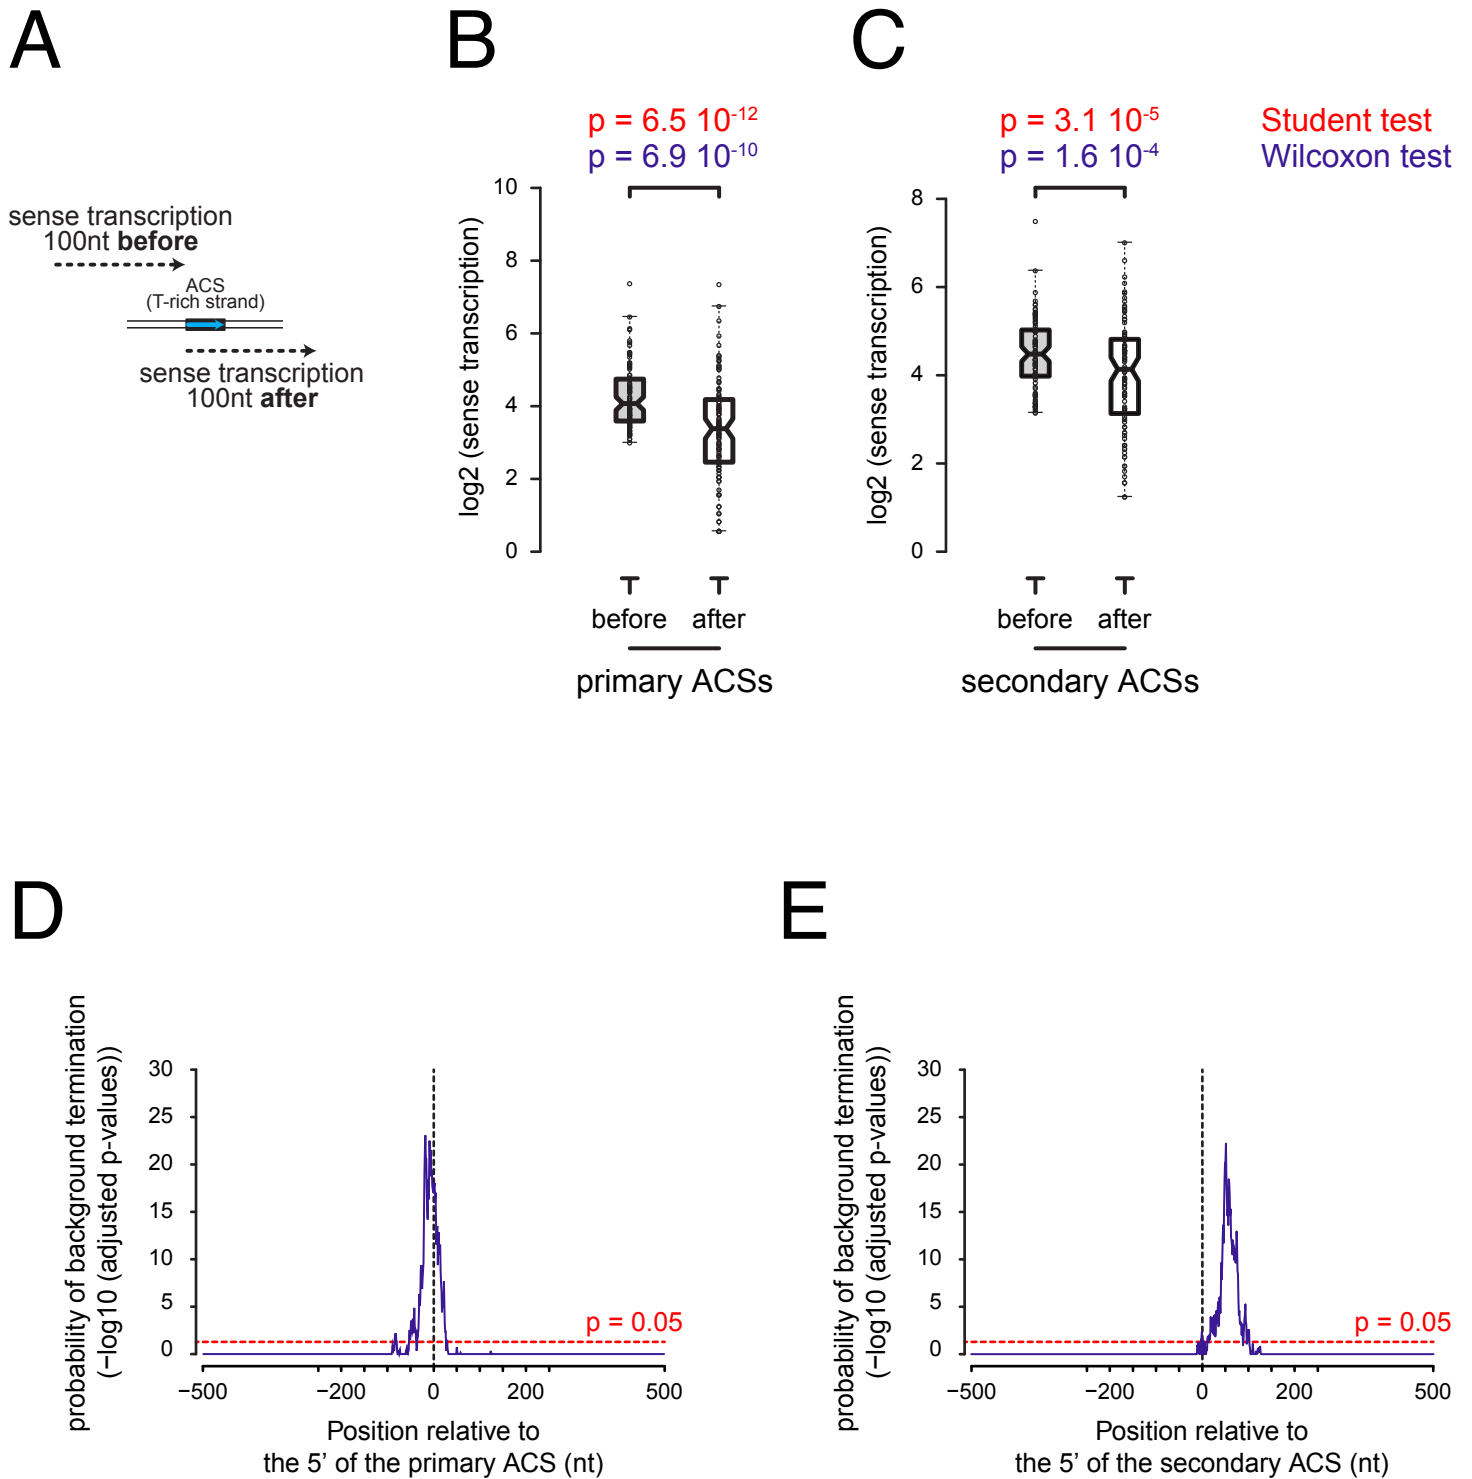

Supplement: supp [file elife-40802-supp-v1.zip]

# Candelli *et al.*, Figure 1-figure supplement 1

A

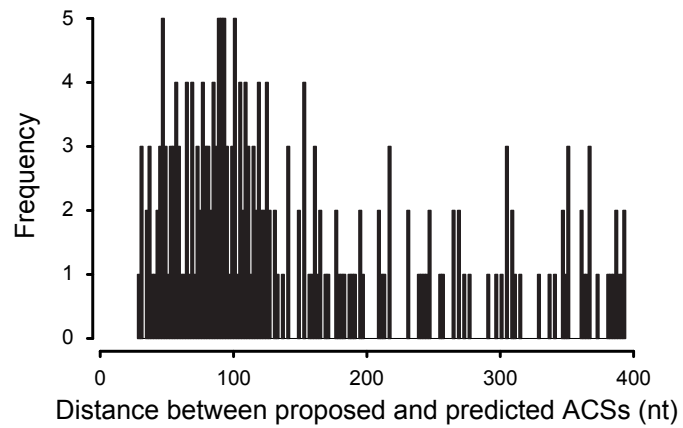

B

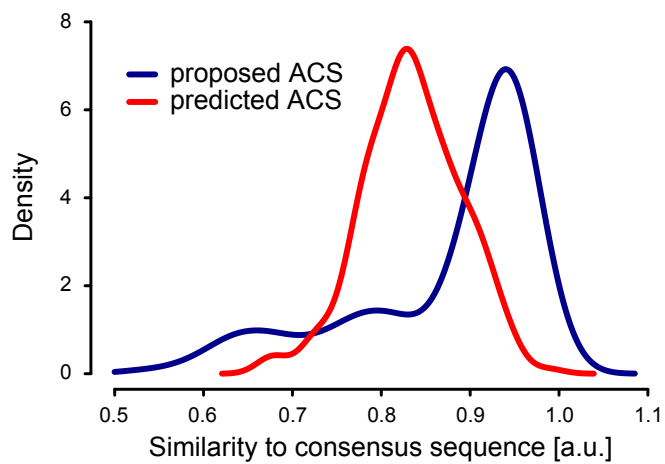

Supplement: supp [file elife-40802-supp-v1.zip]
